# Supplementary material for: Effectiveness of gamma-oryzanol in glycaemic control and managing oxidative stress, inflammation, and dyslipidaemia in diabetes: a systematic review of preclinical studies
Source: PeerJ. 2025 Sep 23;13:e20062. doi: 10.7717/peerj.20062 (PMC12466496; doi:10.7717/peerj.20062)
Supplement: Supplemental Information 4 [file peerj-13-20062-s004.xlsx]

## Sheet: Sheet 1
Studies	Sequence generation (Selection bias)	Baseline characteristics (Selection bias)	Allocation concealment (Selection bias)	Random housing (Performance bias)	Blinding of administrator (Performance bias)	Random outcome assessment (Detection bias)	Blinding of assessor (Detection bias)	Incomplete outcome data (Attrition bias)	Free of selective outcome reporting (Reporting bias)	Other sources of bias (Other bias)	Overall
Chen & Cheng, (2006)	High	Low	Unclear	Unclear	Unclear	Unclear	Unclear	Low	Low	High
Chou et al. (2009)	High	Low	Unclear	Unclear	Unclear	Unclear	Unclear	Low	Low	High	Not applicable
Cheng et al. (2010)	High	Low	Unclear	Unclear	Unclear	Unclear	Unclear	Low	Low	High	Not applicable
Ghatak & Pachal (2012a)	High	High	Unclear	Unclear	Unclear	Unclear	Unclear	Low	Low	Low	Not applicable
Ghatak & Pachal (2012b)	High	High	Unclear	Unclear	Unclear	Unclear	Unclear	Low	Low	Low	Not applicable
Ghatak & Pachal (2014)	High	High	Unclear	Unclear	Unclear	Unclear	Unclear	Low	Low	Low	Not applicable
Kozuka et al. (2017)	High	Low	Unclear	Unclear	Unclear	Unclear	Unclear	Low	Low	Low	Not applicable
Bhaskaragoud et al. (2018)	High	High	Unclear	Unclear	Unclear	Unclear	Unclear	Low	Low	High	Not applicable
Bhaskaragoud et al. (2020)	High	High	Unclear	Unclear	Unclear	Unclear	Unclear	High	Low	High	Not applicable
